# Supplementary material
Source: publisher site journal article supplement (https://cdn.jamanetwork.com/ama/content_public/journal/jama/24791/jcr120005_supp.pdf)
Supplement: Supplementary file 1 [file jcr120005_supp.pdf]

## Supplementary Online Content

Preiss D, Tikkanen MJ, Welsh P, et al. Lipid-modifying therapies and risk of pancreatitis: a meta-analysis. *JAMA*. doi:10.1001/jama.2012.8439.

**eFigure 1A-B.** Funnel Plots for Statin Trials and Fibrate Trials

**eFigure 2A-B.** Meta-Regression Plots of Incident Pancreatitis and the Percentage Magnitude of Triglyceride-Lowering at 1 Year in (A) Statin Trials and (B) Fibrate Trials

**eFigure 1A-B.** Funnel Plots for (A) Statin Trials and (B) Fibrate Trials

**eFigure 1A.** Statin Trials

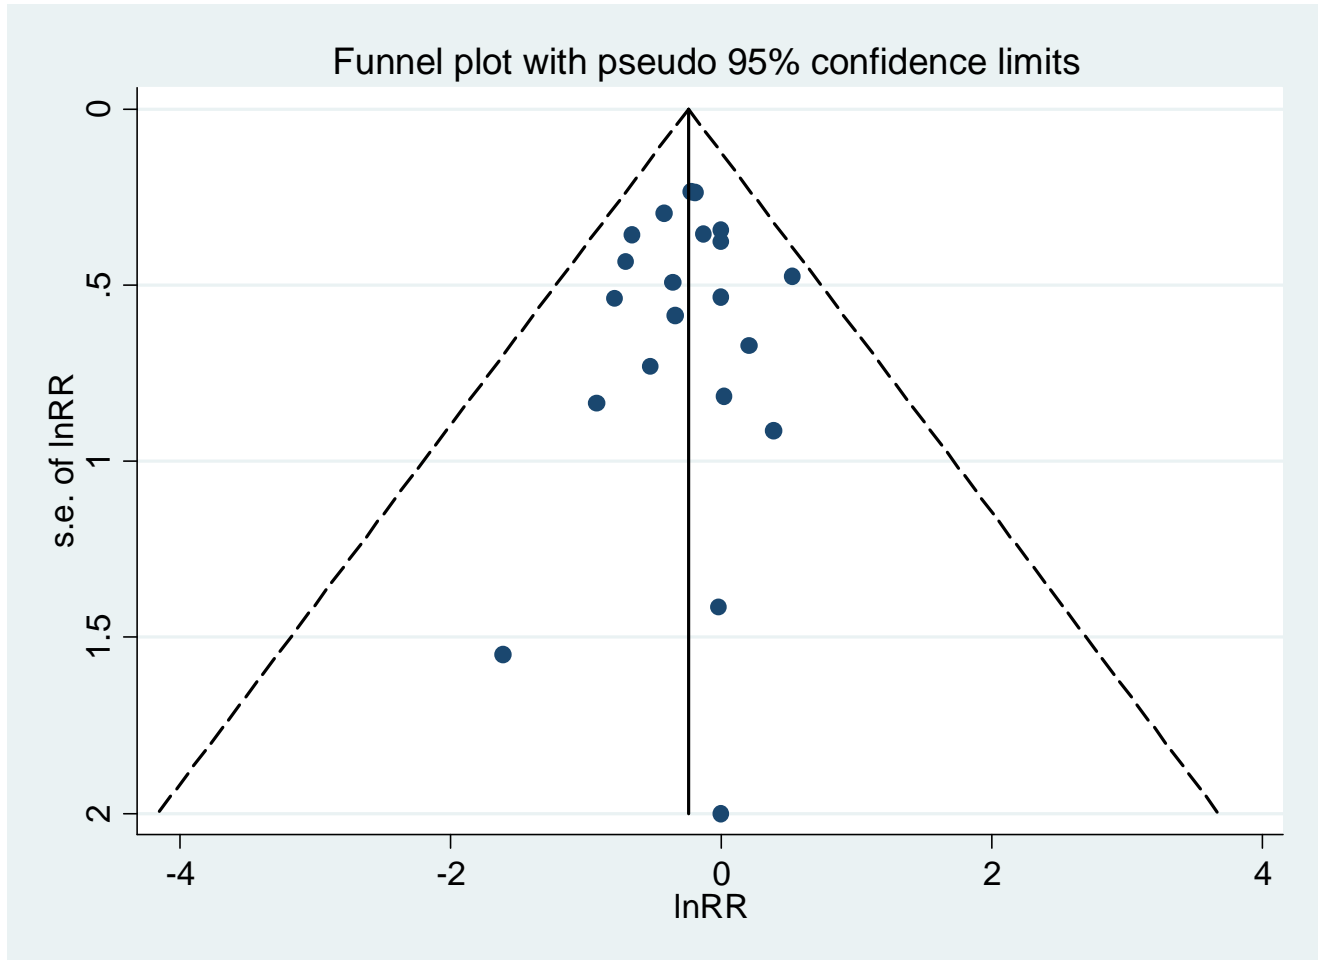

Egger test,  $p=0.83$

**eFigure 1B.** Fibrate Trials

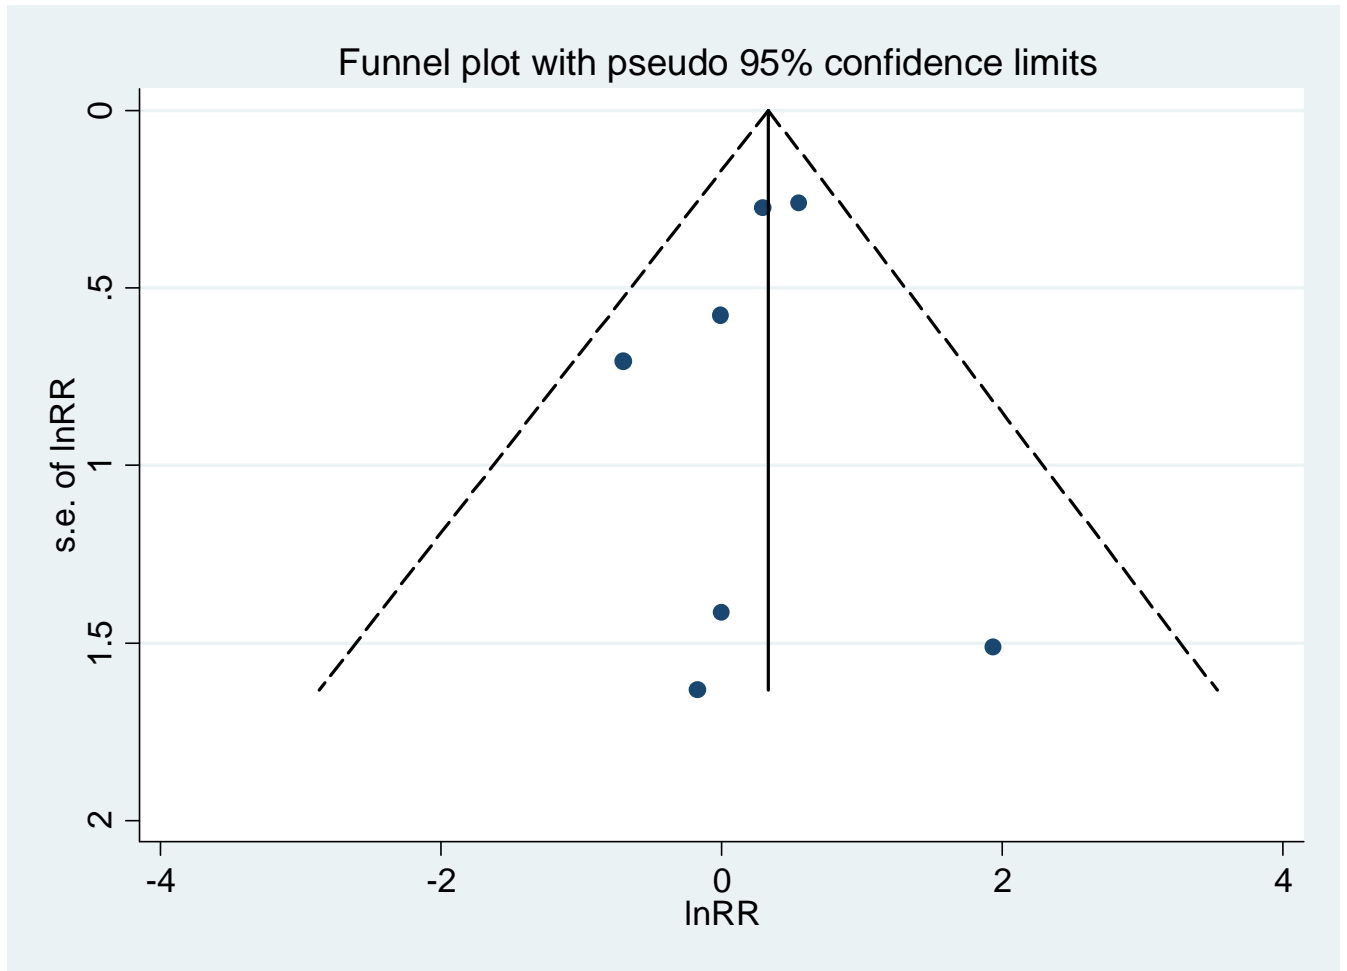

Egger test,  $p=0.59$

**eFigure 2A-B.** Meta-Regression Plots of Incident Pancreatitis and the Percentage Magnitude of Triglyceride-Lowering at 1 Year in (A) Statin Trials and (B) Fibrate Trials

**eFigure 2A.** Statin Trials

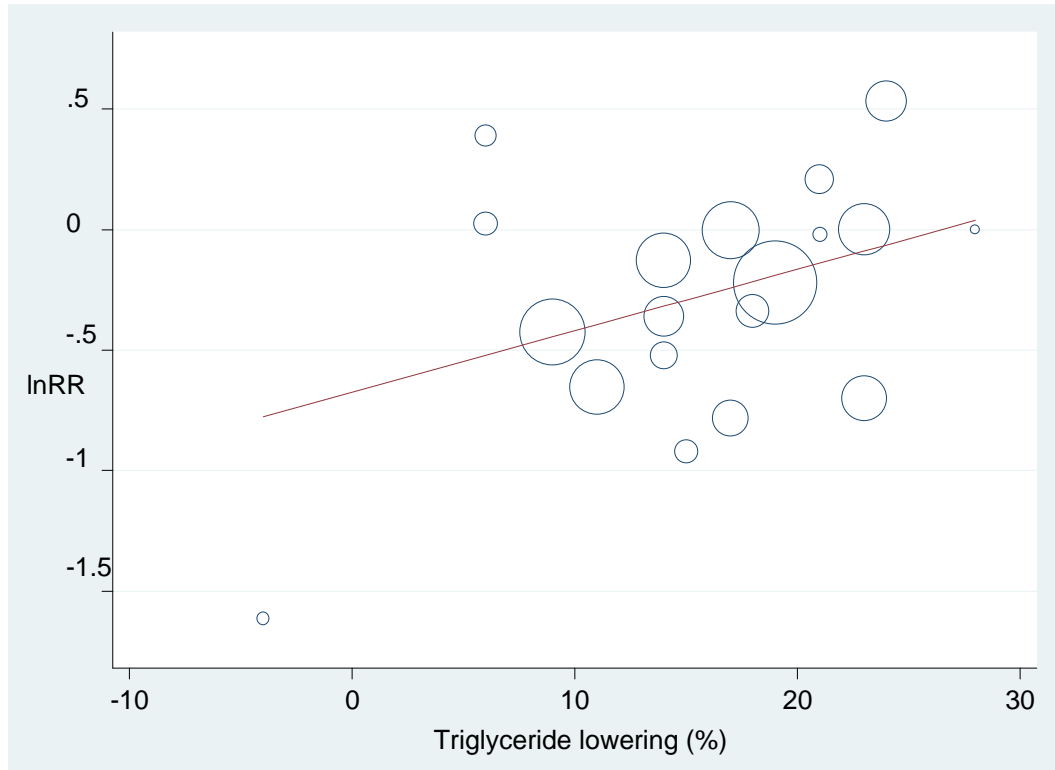

Meta-regression  $p=0.23$ ; data marker size indicates relative weight of the studies  
Data available for 19 of the 21 trials (TNT and GISSI-HF not included due to lack of data for change in triglycerides)  
Random effects meta-regression approach used to fit curve using trial-level data, with studies weighted according to within-trial variance and residual between-trial variance

**eFigure 2B. Fibrate Trials**

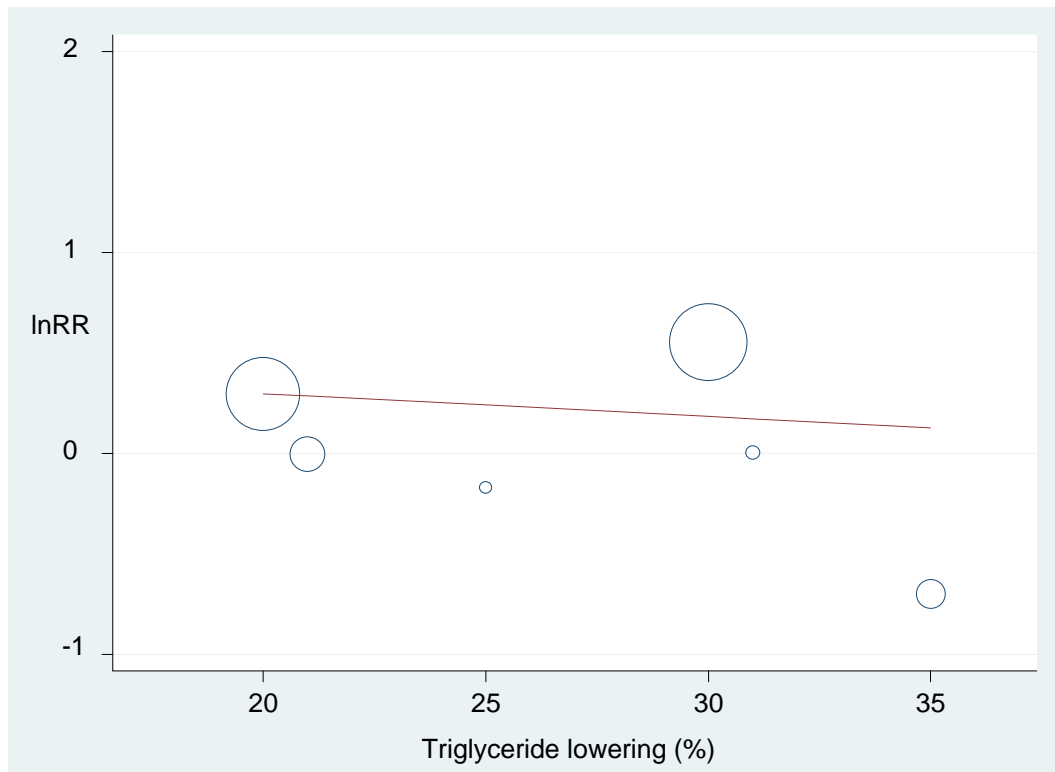

Meta-regression  $p=0.81$ ; data marker size indicates relative weight of the studies  
Data available for 6 of the 7 trials (WHO Co-operative trial not included due to lack of data for change in triglycerides)  
Random effects meta-regression approach used to fit curve using trial-level data, with studies weighted according to within-trial variance and residual between-trial variance.
